# Supplementary material for: The impact of COVID-19 and social distancing on people with Parkinson’s disease: a survey study
Source: PubMed Central journal article supplement (PMC7820020; doi:10.1038/s41531-020-00153-8), 2021-01-21
Supplement: 41531_2020_153_MOESM1_ESM.pdf [file 41531_2020_153_MOESM1_ESM.pdf]

## **Supplementary material**

### **Index**

**Supplementary Table 1.** Demographics and disease characteristics of people with Parkinson's disease with self-reported COVID-19 diagnosis.

**Supplementary Table 2.** COVID-19 knowledge in respondents with Parkinson's disease.

**Supplementary Table 3.** Concerns related to COVID-19.

**Supplementary Table 4.** Changes in behavior due to COVID-19.

**Supplementary Table 5.** Service characteristics and satisfaction of telehealth services used by type.

**Supplementary Table 6.** Changes in exercise and activities, and participation in virtual activities.

**Supplementary Table 7.** Self-reported mood in people with Parkinson's disease.

**Supplementary Table 8.** Adjusted logistic regression on mood.

**Supplementary Table 9.** Most commonly identified open text mood topics.

**Supplementary Methods** - Parkinson's disease COVID-19 questionnaire for people with Parkinson's disease

**Supplementary Table 1.** Demographics and disease characteristics of people with Parkinson’s disease with self-reported COVID-19 diagnosis.

|                                                                                                            | <b>Case (Percent)</b> |
|------------------------------------------------------------------------------------------------------------|-----------------------|
| <b>Reported COVID-19 diagnosis</b>                                                                         | 17 (1.3%)             |
| <b>Age (Mean ± SD)</b>                                                                                     | 70.6 ± 10.8           |
| <b>Disease Duration (Mean ± SD)</b>                                                                        | 6.5 ± 4.7             |
| <b>Age at onset (Mean ± SD)</b>                                                                            | 64.5 ± 11.6           |
| <b>Gender-Female</b>                                                                                       | 9 (52.9%)             |
| <b>Have you had a COVID-19 test to confirm this diagnosis?</b>                                             |                       |
| Yes, test positive for COVID-19                                                                            | 5 (29.4%)             |
| Yes, test negative for COVID-19                                                                            | 4 (23.5%)             |
| yes, waiting results                                                                                       | 1 (5.9%)              |
| Not tested                                                                                                 | 7 (41.2%)             |
| <b>Have you been in communication with a doctor or medical provider to monitor your COVID-19 symptoms?</b> |                       |
| Yes                                                                                                        | 13 (76.5%)            |
| No                                                                                                         | 3 (17.7%)             |
| Not sure                                                                                                   | 1 (5.9%)              |
| <b>Symptoms</b>                                                                                            |                       |
| Fever                                                                                                      | 6 (35.3%)             |
| Chills                                                                                                     | 7 (41.2%)             |
| Cough                                                                                                      | 9 (52.9%)             |
| Shortness of breath                                                                                        | 8 (47.1%)             |
| Sore throat                                                                                                | 6 (35.3%)             |
| Diarrhea                                                                                                   | 3 (17.7%)             |
| Vomiting                                                                                                   | 3 (17.7%)             |
| Temporary loss of smell                                                                                    | 5 (29.4%)             |
| Temporary loss of taste                                                                                    | 4 (23.5%)             |
| Fatigue                                                                                                    | 12 (70.6%)            |
| Muscle pain                                                                                                | 10 (58.8%)            |
| Body aches                                                                                                 | 10 (58.8%)            |
| Headache                                                                                                   | 8 (47.1%)             |
| Confusion/change in behavior                                                                               | 1 (5.9%)              |
| None                                                                                                       | 2 (11.8%)             |
| Not sure                                                                                                   | 1 (5.9%)              |
| <b>Duration (Mean ± SD)</b>                                                                                | 13.5 ± 6.9            |
| <b>Recovered</b>                                                                                           |                       |
| Yes                                                                                                        | 10 (58.8%)            |
| No                                                                                                         | 3 (17.7%)             |
| Not sure                                                                                                   | 4 (23.5%)             |
| <b>Had other people in close contact diagnosed with COVID-19</b>                                           | 4 (23.5%)             |

SD, standard deviation.

**Supplementary Table 2.** COVID-19 knowledge in respondents with Parkinson’s disease.

|                                                                                                                                                        | <b>Correct<br/>(Percent)</b> |
|--------------------------------------------------------------------------------------------------------------------------------------------------------|------------------------------|
| <b>Who can get the COVID-19? - Anyone</b>                                                                                                              | 1308 (97.5%)                 |
| <b>Does everybody who has COVID-19 show symptoms? - No</b>                                                                                             | 1286 (95.8%)                 |
| <b>As far as you know, if someone thinks they are having COVID-19 symptoms, what should they do? - Stay home and call a doctor or medical provider</b> | 1257 (93.7%)                 |
| <b>Knowledge score (Number of correct answers)</b>                                                                                                     |                              |
| 0                                                                                                                                                      | 1 (0.1%)                     |
| 1                                                                                                                                                      | 11 (0.8%)                    |
| 2                                                                                                                                                      | 150 (11.2%)                  |
| 3                                                                                                                                                      | 1180 (87.9%)                 |

**Supplementary Table 3.** Concerns related to COVID-19.

| <b>Type of concerns</b>                                                                              | <b>Case (percent)</b> | <b>To a great extent</b> | <b>Somewhat</b> | <b>Very little</b> | <b>Not at all</b> | <b>Don't know, N/A</b> |
|------------------------------------------------------------------------------------------------------|-----------------------|--------------------------|-----------------|--------------------|-------------------|------------------------|
| Being infected myself                                                                                |                       | 426 (31.7%)              | 617 (46.0%)     | 225 (16.8%)        | 67 (5.0%)         | 7 (0.5%)               |
| Being at an increased risk of infection because of my Parkinson's                                    |                       | 291 (21.7%)              | 474 (35.3%)     | 346 (25.8%)        | 212 (15.8%)       | 19 (1.4%)              |
| Being infected and requiring intensive hospital care (mechanical ventilation or a breathing machine) |                       | 516 (38.5%)              | 442 (32.9%)     | 260 (19.4%)        | 113 (8.4%)        | 11 (0.8%)              |
| Being infected and dying                                                                             |                       | 418 (31.1%)              | 405 (30.2%)     | 333 (24.8%)        | 173 (12.9%)       | 13 (1.0%)              |
| Requiring hospitalization for other non-COVID-19 related health complications                        |                       | 209 (15.6%)              | 434 (32.3%)     | 431 (32.1%)        | 255 (19.0%)       | 13 (1.0%)              |
| Not being able to social distance because of required assistance due to Parkinson's                  |                       | 51 (3.8%)                | 205 (15.3%)     | 373 (27.8%)        | 674 (50.2%)       | 39 (2.9%)              |
| Running out of Parkinson's medications                                                               |                       | 75 (5.6%)                | 198 (14.8%)     | 344 (25.6%)        | 707 (52.7%)       | 18 (1.3%)              |
| Not having enough money for living expenses                                                          |                       | 77 (5.7%)                | 184 (13.7%)     | 325 (24.2%)        | 736 (54.8%)       | 20 (1.5%)              |
| How long it will take for things to go back to normal                                                |                       | 487 (36.3%)              | 610 (45.5%)     | 176 (13.1%)        | 46 (3.4%)         | 23 (1.7%)              |

**Supplementary Table 4.** Changes in behavior due to COVID-19.

| <b>Change in behavior</b>                                                                                                  | <b>Case (percent)</b> | <b>Yes</b>   | <b>No</b>    | <b>Not<br/>Applicable</b> |
|----------------------------------------------------------------------------------------------------------------------------|-----------------------|--------------|--------------|---------------------------|
| Canceled or postponed air travel for work or pleasure                                                                      |                       | 576 (42.9%)  | 247 (18.4%)  | 519<br>(38.7%)            |
| Canceled or postponed personal or social activities                                                                        |                       | 1184 (88.2%) | 90 (6.7%)    | 68 (5.1%)                 |
| Visited a doctor                                                                                                           |                       | 517 (38.5%)  | 738 (55.0%)  | 87 (6.5%)                 |
| Canceled a doctor's appointment                                                                                            |                       | 804 (59.9%)  | 473 (35.2%)  | 65 (4.8%)                 |
| Stockpiled food or water                                                                                                   |                       | 544 (40.5%)  | 761 (56.7%)  | 37 (2.8%)                 |
| Avoided contact with people who could be high-risk                                                                         |                       | 1122 (83.6%) | 153 (11.4%)  | 67 (5.0%)                 |
| Avoided public spaces, gatherings, or crowds                                                                               |                       | 1264 (94.2%) | 58 (4.3%)    | 20 (1.5%)                 |
| Avoided eating at restaurants                                                                                              |                       | 1242 (92.5%) | 55 (4.1%)    | 45 (3.4%)                 |
| Prayed                                                                                                                     |                       | 860 (64.1%)  | 368 (27.4%)  | 114 (8.5%)                |
| Obtained a three-month supply of Parkinson's prescription medications                                                      |                       | 835 (62.4%)  | 451 (33.7%)  | 53 (4%)                   |
| Obtained a three-month supply of other essential prescription medications                                                  |                       | 725 (54.0%)  | 538 (40.1%)  | 79 (5.9%)                 |
| Worked or studied at home                                                                                                  |                       | 521 (38.8%)  | 300 (22.4%)  | 521<br>(38.8%)            |
| Worn a mask or other face covering                                                                                         |                       | 1260 (93.9%) | 76 (5.7%)    | 6 (0.4%)                  |
| Has anything prevented you from following the CDC and government social distancing and coronavirus health recommendations? |                       | 43 (3.2%)    | 1299 (96.8%) |                           |

**Supplementary Table 5.** Service characteristics and satisfaction of telehealth services used by type.

|                                                                                                                                         | Case (Percent)             |                    |                        |                                 |                         |
|-----------------------------------------------------------------------------------------------------------------------------------------|----------------------------|--------------------|------------------------|---------------------------------|-------------------------|
|                                                                                                                                         | Doctor or medical provider | Physical therapist | Occupational therapist | Speech and language pathologist | Mental health therapist |
| <b>Number of observations <sup>a</sup></b>                                                                                              | 745                        | 124                | 25                     | 57                              | 150                     |
| <b>Number of appointments</b>                                                                                                           |                            |                    |                        |                                 |                         |
| 1 appointment                                                                                                                           | 439 (58.9%)                | 46 (37.1%)         | 6 (24.0%)              | 19 (33.3%)                      | 48 (32.0%)              |
| 2 appointments                                                                                                                          | 191 (25.6%)                | 17 (13.7%)         | 6 (24.0%)              | 6 (10.5%)                       | 42 (28.0%)              |
| 3-5 appointments                                                                                                                        | 103 (13.8%)                | 23 (18.5%)         | 5 (20.0%)              | 14 (24.6%)                      | 36 (24.0%)              |
| >=6 appointments                                                                                                                        | 12 (1.6%)                  | 38 (30.6%)         | 8 (32.0%)              | 18 (31.6%)                      | 24 (16.0%)              |
| <b>How was this telehealth or virtual appointment with a doctor of medical provider conducted?</b>                                      |                            |                    |                        |                                 |                         |
| Video- application or smart phone                                                                                                       | 228 (30.6%)                | 23 (18.5%)         | 5 (20.0%)              | <sup>b</sup>                    | 33 (22.0%)              |
| Video- personal computer                                                                                                                | 289 (38.8%)                | 68 (54.8%)         | 9 (36.0%)              | <sup>b</sup>                    | 51 (34.0%)              |
| Phone audio                                                                                                                             | 212 (28.5%)                | 18 (14.5%)         | 3 (12.0%)              | <sup>b</sup>                    | 60 (40.0%)              |
| Other                                                                                                                                   | 16 (2.2%)                  | 15 (12.1%)         | 8 (32.0%)              | <sup>b</sup>                    | 6 (4.0%)                |
| <b>Satisfaction (comparing with in-person visits)</b>                                                                                   |                            |                    |                        |                                 |                         |
| More satisfied                                                                                                                          | 94 (12.6%)                 | 23 (18.5%)         | 9 (36.0%)              | 13 (22.8%)                      | 19 (12.7%)              |
| Equally satisfied                                                                                                                       | 407 (54.6%)                | 52 (41.9%)         | 7 (28.0%)              | 29 (50.9%)                      | 80 (53.3%)              |
| Less satisfied                                                                                                                          | 226 (30.3%)                | 42 (33.9%)         | 8 (32.0%)              | 11 (19.3%)                      | 42 (28.0%)              |
| Not sure                                                                                                                                | 18 (2.4%)                  | 7 (5.6%)           | 1 (4.0%)               | 4 (7.0%)                        | 9 (6.0%)                |
| <b>How frequently would you prefer to continue telehealth or virtual medical appointments after the coronavirus outbreak has ended?</b> |                            |                    |                        |                                 |                         |
| Always                                                                                                                                  | 20 (2.7%)                  | 7 (5.6%)           | 4 (16.0%)              | 4 (7.0%)                        | 6 (4.0%)                |
| Sometimes                                                                                                                               | 343 (46.0%)                | 53 (42.7%)         | 5 (20.0%)              | 24 (42.1%)                      | 63 (42.0%)              |
| Rarely                                                                                                                                  | 292 (39.2%)                | 48 (38.7%)         | 10 (40.0%)             | 23 (40.4%)                      | 63 (42.0%)              |
| Never                                                                                                                                   | 90 (12.1%)                 | 16 (12.9%)         | 6 (24.0%)              | 6 (10.5%)                       | 18 (12.0%)              |
| <b>Were any of your telehealth or virtual appointments related to any of the following medical issues?</b>                              |                            |                    |                        |                                 |                         |
| Routine PD visit                                                                                                                        | 456 (61.2%)                |                    |                        |                                 |                         |
| Urgent PD visit                                                                                                                         | 26 (3.5%)                  |                    |                        |                                 |                         |
| COVID-19 symptom visit                                                                                                                  | 23 (3.1%)                  |                    |                        |                                 |                         |
| Other urgent visit                                                                                                                      | 101 (13.6%)                |                    |                        |                                 |                         |
| None of the above                                                                                                                       | 197 (26.4%)                |                    |                        |                                 |                         |

a. Number displayed included those who used more than one type of telehealth service.

b. Data missing because of an error in questionnaire logic.

**PD**, Parkinson's disease.

**Supplementary Table 6.** Changes in exercise and activities, and participation in virtual activities.

|                                                                                       | <b>Case (Percent)</b> |
|---------------------------------------------------------------------------------------|-----------------------|
| <b>Change in exercise</b>                                                             |                       |
| Reduced                                                                               | 600 (44.7%)           |
| Unchanged                                                                             | 626 (46.6%)           |
| Increased                                                                             | 116 (8.6%)            |
| <b>Change in activities outside of residence</b>                                      |                       |
| Reduced                                                                               | 978 (72.9%)           |
| Unchanged                                                                             | 313 (23.3%)           |
| Increased                                                                             | 51 (3.8%)             |
| <b>Have activities available in a virtual/online format</b>                           | 1099 (81.9%)          |
| <b>Participated in those activities in a virtual/online format? <sup>a</sup></b>      | 999 (90.9%)           |
| <b>What activities have you participated in a virtual/online format? <sup>b</sup></b> |                       |
| Exercise or wellness class                                                            | 583 (58.4%)           |
| Support groups                                                                        | 316 (31.6%)           |
| Recreational classes (art, dance, drama, etc.)                                        | 125 (12.5%)           |
| Religious services                                                                    | 460 (46.0%)           |
| Educational events                                                                    | 355 (35.5%)           |
| Other                                                                                 | 222 (22.2%)           |

a. Percentage out of 1099 total.

b. Percentage out of 999 total.

**Supplementary Table 7.** Self-reported mood in people with Parkinson’s disease.

|                                                    | <b>Any</b>             |                                |                     | <b>Not at all</b> |
|----------------------------------------------------|------------------------|--------------------------------|---------------------|-------------------|
|                                                    | <b>Nearly everyday</b> | <b>More than half the days</b> | <b>Several days</b> |                   |
| <b>Feeling nervous, anxious, or on edge</b>        | 153 (11.4%)            | 188 (14.0%)                    | 552 (41.1%)         | 449 (33.5%)       |
| <b>Not being able to stop or control worrying</b>  | 78 (5.8%)              | 132 (9.9%)                     | 395 (29.4%)         | 737 (54.9%)       |
| <b>Feeling down, depressed, or hopeless</b>        | 80 (6.0%)              | 108 (8.1%)                     | 494 (36.9%)         | 659 (49.1%)       |
| <b>Little interest or pleasure in doing things</b> | 80 (6.0%)              | 141 (10.5%)                    | 499 (37.2%)         | 622 (46.3%)       |
| <b>Had sleep interruptions or disturbances</b>     | 149 (11.1%)            | 216 (16.1%)                    | 523 (39.0%)         | 454 (33.8%)       |
| <b>Feeling isolated, left out or alone</b>         | 83 (6.2%)              | 112 (8.4%)                     | 419 (31.2%)         | 728 (54.2%)       |



**Supplementary Table 8.** Adjusted logistic regression using mood as outcome (any vs. absence).

| Predictors                               | Nervous/anxious   |                  | Worry             |                  | Depressed         |                  | No interest       |                  | Sleep disturbance |                  | Isolated          |                  |       |
|------------------------------------------|-------------------|------------------|-------------------|------------------|-------------------|------------------|-------------------|------------------|-------------------|------------------|-------------------|------------------|-------|
|                                          | OR (95%CI)        | P                | OR (95%CI)        | P                | OR (95%CI)        | P                | OR (95%CI)        | P                | OR (95%CI)        | P                | OR (95%CI)        | P                |       |
| <b>Age</b>                               | 2.31 (0.25-21.52) | 0.462            | 0.65 (0.07-5.80)  | 0.696            | 1.42 (0.16-12.70) | 0.754            | 0.41 (0.04-4.07)  | 0.449            | 1.58 (0.17-15.18) | 0.690            | 0.63 (0.07-5.79)  | 0.686            |       |
| <b>Disease duration</b>                  | 0.43 (0.05-4.00)  | 0.456            | 1.53 (0.17-13.86) | 0.703            | 0.7 (0.08-6.26)   | 0.747            | 2.4 (0.24-23.77)  | 0.454            | 0.62 (0.06-5.98)  | 0.680            | 1.55 (0.17-14.21) | 0.699            |       |
| <b>Age at onset</b>                      | 0.43 (0.05-4.03)  | 0.462            | 1.56 (0.17-14.04) | 0.692            | 0.71 (0.08-6.32)  | 0.755            | 2.41 (0.24-23.76) | 0.452            | 0.62 (0.06-5.90)  | 0.673            | 1.55 (0.17-14.17) | 0.698            |       |
| <b>Taking L-dopa</b>                     | 1.2 (0.73-1.99)   | 0.478            | 1.33 (0.82-2.14)  | 0.250            | 1.48 (0.92-2.38)  | 0.107            | 1.63 (1.02-2.62)  | 0.042            | 2.23 (1.39-3.58)  | 0.001            | 1.52 (0.93-2.47)  | 0.092            |       |
| <b>Received post-secondary education</b> | 0.94 (0.44-2.04)  | 0.882            | 0.78 (0.40-1.51)  | 0.460            | 0.61 (0.30-1.22)  | 0.164            | 0.71 (0.35-1.43)  | 0.341            | 0.98 (0.46-2.05)  | 0.948            | 1.38 (0.71-2.69)  | 0.348            |       |
| <b>Gender- Female</b>                    | 1.81 (1.31-2.50)  | <0.001           | 1.56 (1.16-2.10)  | 0.003            | 1.48 (1.10-1.98)  | 0.010            | 1.3 (0.97-1.75)   | 0.080            | 1.49 (1.08-2.05)  | 0.015            | 1.59 (1.19-2.14)  | 0.002            |       |
| <b>Race-White</b>                        | 1.82 (1.07-3.12)  | 0.029            | 0.85 (0.51-1.43)  | 0.537            | 0.8 (0.47-1.36)   | 0.408            | 1.31 (0.78-2.21)  | 0.308            | 0.98 (0.56-1.73)  | 0.949            | 0.92 (0.54-1.55)  | 0.744            |       |
| <b>Income</b>                            | <50k              | Reference        |                   |                  |                   |                  |                   |                  |                   |                  |                   |                  |       |
|                                          | 50-100k           | 0.83 (0.54-1.26) | 0.371             | 0.68 (0.47-0.99) | 0.043             | 0.8 (0.55-1.16)  | 0.234             | 0.83 (0.57-1.21) | 0.338             | 0.82 (0.55-1.24) | 0.355             | 0.78 (0.54-1.14) | 0.197 |
|                                          | >100k             | 0.63 (0.41-0.98) | 0.039             | 0.58 (0.40-0.86) | 0.007             | 0.53 (0.36-0.79) | 0.002             | 0.59 (0.40-0.88) | 0.009             | 0.7 (0.46-1.08)  | 0.107             | 0.53 (0.36-0.79) | 0.002 |
| <b>Employment</b>                        | Unemployed        | Reference        |                   |                  |                   |                  |                   |                  |                   |                  |                   |                  |       |
|                                          | Employed          | 0.61 (0.30-1.25) | 0.177             | 0.62 (0.34-1.13) | 0.116             | 0.86 (0.47-1.55) | 0.606             | 0.53 (0.29-0.96) | 0.037             | 0.79 (0.40-1.56) | 0.492             | 0.59 (0.32-1.08) | 0.086 |
|                                          | Retired           | 0.43 (0.22-0.83) | 0.013             | 0.59 (0.34-1.01) | 0.052             | 0.99 (0.57-1.70) | 0.961             | 0.69 (0.40-1.21) | 0.196             | 0.81 (0.43-1.51) | 0.503             | 0.74 (0.43-1.28) | 0.278 |
| <b>State (cases per 100,000)</b>         | <200              | Reference        |                   |                  |                   |                  |                   |                  |                   |                  |                   |                  |       |
|                                          | 200-750           | 0.71 (0.34-1.48) | 0.361             | 0.67 (0.36-1.25) | 0.208             | 1.03 (0.55-1.93) | 0.939             | 0.73 (0.38-1.40) | 0.347             | 1.09 (0.56-2.11) | 0.805             | 0.97 (0.51-1.81) | 0.915 |
|                                          | >750              | 0.68 (0.32-1.44) | 0.314             | 0.78 (0.41-1.49) | 0.455             | 0.85 (0.44-1.64) | 0.633             | 0.69 (0.35-1.35) | 0.280             | 1.07 (0.54-2.13) | 0.841             | 1.02 (0.53-1.97) | 0.946 |
| <b>Reduced exercise</b>                  | 1.41 (1.03-1.94)  | 0.034            | 1.38 (1.03-1.85)  | 0.030            | 1.36 (1.02-1.83)  | 0.037            | 1.49 (1.11-2.00)  | 0.008            | 1.16 (0.85-1.58)  | 0.366            | 1.5 (1.12-2.01)   | 0.006            |       |
| <b>Reduced activity</b>                  | 1.21 (0.85-1.72)  | 0.302            | 1.15 (0.82-1.61)  | 0.412            | 1.4 (1.00-1.95)   | 0.052            | 1.06 (0.76-1.49)  | 0.727            | 1.35 (0.95-1.92)  | 0.093            | 1.33 (0.95-1.87)  | 0.102            |       |
| <b>Used telehealth</b>                   | 0.97 (0.70-1.35)  | 0.862            | 1.18 (0.87-1.60)  | 0.279            | 1.32 (0.97-1.79)  | 0.076            | 1.19 (0.88-1.62)  | 0.263            | 1.1 (0.79-1.52)   | 0.583            | 1.18 (0.87-1.61)  | 0.289            |       |
| <b>Participated activities online</b>    | 0.99 (0.57-1.7)   | 0.962            | 0.86 (0.52-1.43)  | 0.556            | 1.18 (0.71-1.98)  | 0.524            | 0.76 (0.45-1.28)  | 0.309            | 1.54 (0.91-2.60)  | 0.104            | 0.99 (0.59-1.66)  | 0.978            |       |
| <b>COVID-19 knowledge score</b>          | 1.34 (0.87-2.06)  | 0.185            | 1.01 (0.66-1.53)  | 0.976            | 1.5 (0.99-2.30)   | 0.059            | 1.36 (0.90-2.07)  | 0.146            | 0.73 (0.46-1.15)  | 0.175            | 1.09 (0.72-1.67)  | 0.677            |       |

**Supplementary Table 9.** Most commonly identified open text mood topics.

|                                                                   | <b>Case (Percent)</b> |
|-------------------------------------------------------------------|-----------------------|
| <b>Feeling nervous, anxious, or on edge (n = 250)</b>             |                       |
| Fear of getting infected                                          | 54 (21.6%)            |
| The unknowns about when COVID-19 would be resolved                | 33 (13.2%)            |
| Fear for family                                                   | 29 (11.6%)            |
| Inability to see or have physical contact family and friends      | 29 (11.6%)            |
| <b>Not being able to stop or control worrying (n = 140)</b>       |                       |
| The unknowns about when COVID-19 would be resolved                | 22 (15.7%)            |
| Constant media coverage of COVID-19                               | 18 (12.9%)            |
| Lack of control/helplessness                                      | 18 (12.9%)            |
| <b>Feeling down, depressed, or hopeless (n = 126)</b>             |                       |
| Inability to see or have physical contact family and friends      | 20 (15.9%)            |
| Having a history of depression unrelated to COVID-19              | 15 (11.9%)            |
| Disruption or change in routines                                  | 9 (7.1%)              |
| Inability to leave the house for social distancing reasons        | 9 (7.1%)              |
| Isolation and loneliness                                          | 9 (7.1%)              |
| <b>Little interest or pleasure in doing things (n = 160)</b>      |                       |
| Inability to leave the house for social distancing reasons        | 23 (14.4%)            |
| Having a history of lost interest or apathy unrelated to COVID-19 | 22 (13.8%)            |
| General negative outlook or hopelessness                          | 21 (13.1%)            |
| <b>Had sleep interruptions or disturbances (n = 277)</b>          |                       |
| Having a history of sleep issues unrelated to COVID-19            | 99 (35.7%)            |
| Worry                                                             | 95 (34.3%)            |
| The unknowns about when COVID-19 would be resolved                | 14 (5.1%)             |
| <b>Feeling isolated, left out or alone (n = 138)</b>              |                       |
| Inability to see or have physical contact family and friends      | 49 (35.5%)            |
| Isolation and loneliness                                          | 37 (26.8%)            |
| Inability to participate in in-person social activities           | 28 (20.3%)            |

## Parkinson's disease COVID-19 questionnaire

| Variable / Field Name | Question                                                                                                                                                                | Choices, Calculations, OR Slider Labels                                                                                                                                                                                                                                                                                                                                                                                                                                                                                                                                                                                                                                                                                                                                                   | Branching Logic (Show field only if...)                              | Required Field? |
|-----------------------|-------------------------------------------------------------------------------------------------------------------------------------------------------------------------|-------------------------------------------------------------------------------------------------------------------------------------------------------------------------------------------------------------------------------------------------------------------------------------------------------------------------------------------------------------------------------------------------------------------------------------------------------------------------------------------------------------------------------------------------------------------------------------------------------------------------------------------------------------------------------------------------------------------------------------------------------------------------------------------|----------------------------------------------------------------------|-----------------|
| diagnosis_1           | Has a doctor or another healthcare professional diagnosed you or someone in close proximity to you as having or probably having COVID-19? Please select all that apply. | 1, I was diagnosed as having or probably having COVID-19   2, My care partner was diagnosed as having or probably having COVID-19   3, Someone in my household or residence was diagnosed as having or probably having COVID-19   4, Someone who regularly supports me in my household such as a home health assistant or nursing assistant was diagnosed as having or probably having COVID-19   5, An immediate family member not in my household but with whom I am in close contact was diagnosed as having or probably having COVID-19 (can include spouse, parent, children, grandchildren, siblings and in-laws)   6, A friend whom I am in close contact with was diagnosed as having or probably having COVID-19   7, No one was diagnosed as having or probably having COVID-19 | [directory_1] = '1' and ([directory_2] = '1' or [directory_2] = '3') | y               |
| diagnosis_1_1_pwp     | Have you had a COVID-19 test to confirm this diagnosis?                                                                                                                 | 1, Yes, tested and received a positive test result   2, Yes, tested but received a negative test result   3, Tested, but awaiting test results   4, No, not tested   5, Not sure                                                                                                                                                                                                                                                                                                                                                                                                                                                                                                                                                                                                          | [diagnosis_1(1)] = '1'                                               | y               |

|                         |                                                                                  |                                                                                                                                                                                  |                        |   |
|-------------------------|----------------------------------------------------------------------------------|----------------------------------------------------------------------------------------------------------------------------------------------------------------------------------|------------------------|---|
| diagnosis_1_1_cp        | Has your care partner had a COVID-19 test to confirm this diagnosis?             | 1, Yes, tested and received a positive test result   2, Yes, tested but received a negative test result   3, Tested, but awaiting test results   4, No, not tested   5, Not sure | [diagnosis_1(2)] = '1' | y |
| diagnosis_1_1_household | Has this member of your household had a COVID-19 test to confirm this diagnosis? | 1, Yes, tested and received a positive test result   2, Yes, tested but received a negative test result   3, Tested, but awaiting test results   4, No, not tested   5, Not sure | [diagnosis_1(3)] = '1' | y |

|                      |                                                                               |                                                                                                                                                                                  |                        |   |
|----------------------|-------------------------------------------------------------------------------|----------------------------------------------------------------------------------------------------------------------------------------------------------------------------------|------------------------|---|
| diagnosis_1_1_assist | Has your home health assistant had a COVID-19 test to confirm this diagnosis? | 1, Yes, tested and received a positive test result   2, Yes, tested but received a negative test result   3, Tested, but awaiting test results   4, No, not tested   5, Not sure | [diagnosis_1(4)] = '1' | y |
| diagnosis_1_1_family | Has this family member had a COVID-19 test to confirm this diagnosis?         | 1, Yes, tested and received a positive test result   2, Yes, tested but received a negative test result   3, Tested, but awaiting test results   4, No, not tested   5, Not sure | [diagnosis_1(5)] = '1' | y |

|                         |                                                                                                                               |                                                                                                                                                                                                                                                                                                                       |                              |   |
|-------------------------|-------------------------------------------------------------------------------------------------------------------------------|-----------------------------------------------------------------------------------------------------------------------------------------------------------------------------------------------------------------------------------------------------------------------------------------------------------------------|------------------------------|---|
| diagnosis_1_1_friend    | Has this friend had a COVID-19 test to confirm this diagnosis?                                                                | 1, Yes, tested and received a positive test result   2, Yes, tested but received a negative test result   3, Tested, but awaiting test results   4, No, not tested   5, Not sure                                                                                                                                      | [diagnosis_1(6)] = '1'       | y |
| diagnosis_1_2_pwp       | Have you been in communication with a doctor or medical provider to monitor your COVID-19 symptoms?                           | 1, Yes   2, No   3, Not sure                                                                                                                                                                                                                                                                                          | [diagnosis_1(1)] = '1'       | y |
| diagnosis_1_2_cp        | Has your care partner been in communication with a doctor or medical provider to monitor their COVID-19 symptoms?             | 1, Yes   2, No   3, Not sure                                                                                                                                                                                                                                                                                          | [diagnosis_1(2)] = '1'       | y |
| diagnosis_1_2_household | Has this member of your household been in communication with a doctor or medical provider to monitor their COVID-19 symptoms? | 1, Yes   2, No   3, Not sure                                                                                                                                                                                                                                                                                          | [diagnosis_1(3)] = '1'       | y |
| diagnosis_1_3_pwp       | How have you been managing COVID-19? <span style="font-weight: normal;">Please select all that apply.</span>                  | 1, Isolating at home   2, Isolating in an assisted living facility   3, Staying with family   4, Through non-critical hospital care   5, Through critical hospital care (in an intensive care unit (ICU) or on a ventilator)   6, Passed away from COVID-19 or complications due to COVID-19   7, Other   8, Not sure | [diagnosis_1(1)] = '1'       | y |
| diagnosis_1_3_pwp_1     | In what other way have you managed COVID-19?                                                                                  |                                                                                                                                                                                                                                                                                                                       | [diagnosis_1_3_pwp(7)] = '1' | y |
| diagnosis_1_3_cp        | How has your care partner been managing COVID-19? Please select all that apply.                                               | 1, Isolating at home   2, Isolating in an assisted living facility   3, Staying with family   4, Through non-critical hospital care   5, Through critical hospital care (in an intensive care unit                                                                                                                    | [diagnosis_1(2)] = '1'       | y |

|                           |                                                                                                                                          |                                                                                                                                                                                                                                                                                                                       |                                    |   |
|---------------------------|------------------------------------------------------------------------------------------------------------------------------------------|-----------------------------------------------------------------------------------------------------------------------------------------------------------------------------------------------------------------------------------------------------------------------------------------------------------------------|------------------------------------|---|
|                           |                                                                                                                                          | (ICU) or on a ventilator)   6, Passed away from COVID-19 or complications due to COVID-19   7, Other   8, Not sure                                                                                                                                                                                                    |                                    |   |
| diagnosis_1_3_cp_1        | In what other way have they managed COVID-19?                                                                                            |                                                                                                                                                                                                                                                                                                                       | [diagnosis_1_3_cp(7)] = '1'        | y |
| diagnosis_1_3_household   | How has this member of your household been managing COVID-19? Please select all that apply.                                              | 1, Isolating at home   2, Isolating in an assisted living facility   3, Staying with family   4, Through non-critical hospital care   5, Through critical hospital care (in an intensive care unit (ICU) or on a ventilator)   6, Passed away from COVID-19 or complications due to COVID-19   7, Other   8, Not sure | [diagnosis_1(3)] = '1'             | y |
| diagnosis_1_3_household_1 | In what other way have they managed COVID-19?                                                                                            |                                                                                                                                                                                                                                                                                                                       | [diagnosis_1_3_household(7)] = '1' | y |
| diagnosis_1_4_pwp         | Where did you first seek medical care for COVID-19? This can include reaching out in person or over the phone.                           | 1, Hospital or emergency room   2, Urgent care   3, My primary care doctor or another doctor   4, A local health department   5, Other   6, I did not seek medical care                                                                                                                                               | [diagnosis_1(1)] = '1'             | y |
| diagnosis_1_4_pwp_1       | At what other place did you first seek medical care for COVID-19?                                                                        |                                                                                                                                                                                                                                                                                                                       | [diagnosis_1_4_pwp] = '5'          | y |
| diagnosis_1_4_cp          | Where did your care partner first seek medical care for COVID-19? This can include reaching out in person or over the phone.             | 1, Hospital or emergency room   2, Urgent care   3, Their primary care doctor or another doctor   4, A local health department   5, Other   6, I did not seek medical care                                                                                                                                            | [diagnosis_1(2)] = '1'             | y |
| diagnosis_1_4_cp_1        | At what other place did your care partner first seek medical care for COVID-19?                                                          |                                                                                                                                                                                                                                                                                                                       | [diagnosis_1_4_cp] = '5'           | y |
| diagnosis_1_4_household   | Where did this member of your household first seek medical care for COVID-19? This can include reaching out in person or over the phone. | 1, Hospital or emergency room   2, Urgent care   3, Their primary care doctor or another doctor   4, A local health department   5, Other   6, I did not seek medical care                                                                                                                                            | [diagnosis_1(3)] = '1'             | y |
| diagnosis_1_4_cp_3        | At what other place did this member of your household first seek medical care for COVID-19?                                              |                                                                                                                                                                                                                                                                                                                       | [diagnosis_1_4_household] = '5'    | y |
| diagnosis_1_5_pwp         | What COVID-19 symptoms did you experience? Please select all that apply.                                                                 | 1, Fever   2, Chills   3, Cough   4, Shortness of breath   5, Sore throat   6, Diarrhea   7, Vomiting   8,                                                                                                                                                                                                            | [diagnosis_1(1)] = '1'             | y |

|                         |                                                                                                             |                                                                                                                                                                                                                                                                                                                                                    |                        |   |
|-------------------------|-------------------------------------------------------------------------------------------------------------|----------------------------------------------------------------------------------------------------------------------------------------------------------------------------------------------------------------------------------------------------------------------------------------------------------------------------------------------------|------------------------|---|
|                         |                                                                                                             | Temporary loss of smell   9,<br>Temporary loss of taste   10, Fatigue  <br>11, Muscle pain   12, Body aches   13,<br>Headache   14, Confusion or change in<br>behavior   15, I had none of these<br>symptoms   16, Not sure                                                                                                                        |                        |   |
| diagnosis_1_5_cp        | What COVID-19 symptoms did<br>your care partner experience?<br>Please select all that apply.                | 1, Fever   2, Chills   3, Cough   4,<br>Shortness of breath   5, Sore throat  <br>6, Diarrhea   7, Vomiting   8,<br>Temporary loss of smell   9,<br>Temporary loss of taste   10, Fatigue  <br>11, Muscle pain   12, Body aches   13,<br>Headache   14, Confusion or change in<br>behavior   15, They had none of these<br>symptoms   16, Not sure | [diagnosis_1(2)] = '1' | y |
| diagnosis_1_5_household | What COVID-19 symptoms did this<br>member of your household<br>experience? Please select all that<br>apply. | 1, Fever   2, Chills   3, Cough   4,<br>Shortness of breath   5, Sore throat  <br>6, Diarrhea   7, Vomiting   8,<br>Temporary loss of smell   9,<br>Temporary loss of taste   10, Fatigue  <br>11, Muscle pain   12, Body aches   13,<br>Headache   14, Confusion or change in<br>behavior   15, They had none of these<br>symptoms   16, Not sure | [diagnosis_1(3)] = '1' | y |
| diagnosis_1_6_pwp       | For how many days have you<br>experienced COVID-19 symptoms?                                                | 1, 1   2, 2   3, 3   4, 4   5, 5   6, 6   7, 7<br>  8, 8   9, 9   10, 10   11, 11   12, 12  <br>13, 13   14, 14   15, 15   16, 16   17,<br>17   18, 18   19, 19   20, 20   21, 21  <br>22, 22   23, 23   24, 24   25, 25   26,<br>26   27, 27   28, 28   29, 29   30, 30  <br>31, 30+ days   32, Not sure                                          | [diagnosis_1(1)] = '1' | y |
| diagnosis_1_6_cp        | For how many days has your care<br>partner experienced COVID-19<br>symptoms?                                | 1, 1   2, 2   3, 3   4, 4   5, 5   6, 6   7, 7<br>  8, 8   9, 9   10, 10   11, 11   12, 12  <br>13, 13   14, 14   15, 15   16, 16   17,<br>17   18, 18   19, 19   20, 20   21, 21  <br>22, 22   23, 23   24, 24   25, 25   26,<br>26   27, 27   28, 28   29, 29   30, 30  <br>31, 30+ days   32, Not sure                                          | [diagnosis_1(2)] = '1' | y |



|                         |                                                                                                                                                                                                                                                                             |                                                                                                                                                                                                                                                                                         |                           |   |
|-------------------------|-----------------------------------------------------------------------------------------------------------------------------------------------------------------------------------------------------------------------------------------------------------------------------|-----------------------------------------------------------------------------------------------------------------------------------------------------------------------------------------------------------------------------------------------------------------------------------------|---------------------------|---|
| diagnosis_1_6_household | For how many days has this member of your household experienced COVID-19 symptoms?                                                                                                                                                                                          | 1, 1   2, 2   3, 3   4, 4   5, 5   6, 6   7, 7   8, 8   9, 9   10, 10   11, 11   12, 12   13, 13   14, 14   15, 15   16, 16   17, 17   18, 18   19, 19   20, 20   21, 21   22, 22   23, 23   24, 24   25, 25   26, 26   27, 27   28, 28   29, 29   30, 30   31, 30+ days   32, Not sure | [diagnosis_1(3)] = '1'    | y |
| diagnosis_1_7_pwp       | Have you recovered from COVID-19?                                                                                                                                                                                                                                           | 1, Yes   2, No   3, Not sure                                                                                                                                                                                                                                                            | [diagnosis_1(1)] = '1'    | y |
| diagnosis_1_7_cp        | Has your care partner recovered from COVID-19?                                                                                                                                                                                                                              | 1, Yes   2, No   3, Not sure                                                                                                                                                                                                                                                            | [diagnosis_1(2)] = '1'    | y |
| diagnosis_1_7_household | Has this member of your household recovered from COVID-19?                                                                                                                                                                                                                  | 1, Yes   2, No   3, Not sure                                                                                                                                                                                                                                                            | [diagnosis_1(3)] = '1'    | y |
| diagnosis_1_8_pwp       | To learn more about how the coronavirus effects the health of people with Parkinson's disease, can a member of the research team from Parkinson's Foundation or Columbia University call you with more detailed questions about your COVID-19 symptoms and health outcomes? | 1, Yes   2, No                                                                                                                                                                                                                                                                          | [diagnosis_1(1)] = '1'    |   |
| diagnosis_1_9_pwp_1     | Please provide your name, email and phone number so that we may follow-up with you.<br><br>Name:                                                                                                                                                                            |                                                                                                                                                                                                                                                                                         | [diagnosis_1_8_pwp] = '1' |   |
| diagnosis_1_9_pwp_2     | Email:                                                                                                                                                                                                                                                                      |                                                                                                                                                                                                                                                                                         | [diagnosis_1_8_pwp] = '1' |   |

|                     |                                                                                                     |                                                                                                                                                                                                                                                                                                                                                                                                                                                                                                                                                                                                                                                                      |                                                                      |   |
|---------------------|-----------------------------------------------------------------------------------------------------|----------------------------------------------------------------------------------------------------------------------------------------------------------------------------------------------------------------------------------------------------------------------------------------------------------------------------------------------------------------------------------------------------------------------------------------------------------------------------------------------------------------------------------------------------------------------------------------------------------------------------------------------------------------------|----------------------------------------------------------------------|---|
| diagnosis_1_9_pwp_3 | Phone number:                                                                                       |                                                                                                                                                                                                                                                                                                                                                                                                                                                                                                                                                                                                                                                                      | [diagnosis_1_8_pwp] = '1'                                            |   |
| diagnosis_2         | Have you tried to get tested for COVID-19?                                                          | 1, Yes, and I was able to get tested   2, Yes, but testing was not locally available   3, Yes, but the doctor or provider would not allow me to get tested or did not feel that my symptoms were severe enough to get tested   4, Yes, but I could not afford the cost of testing   5, No, I did not try to get tested for COVID-19   6, Other                                                                                                                                                                                                                                                                                                                       | [directory_1] = '1' and ([directory_2] = '1' or [directory_2] = '3') | y |
| diagnosis_2_1       | For what other reason were you unable to get tested for COVID-19?                                   |                                                                                                                                                                                                                                                                                                                                                                                                                                                                                                                                                                                                                                                                      | [diagnosis_2] = '6'                                                  | y |
| diagnosis_3         | To your knowledge, has a doctor ever told you that you had any of the following medical conditions? | 1, Any heart disease or history of heart attack or stroke   2, Any chronic lung disease (e.g., asthma, chronic obstructive pulmonary disease, COPD/emphysema/chronic bronchitis)   3, Active/current cancer   4, Hypertension (high blood pressure)   5, Diabetes (high blood sugar)   6, Severe obesity   7, Any autoimmune disease (e.g., lupus, multiple sclerosis, rheumatoid arthritis, psoriasis, Crohn's disease, inflammatory bowel disease)   8, Any depressive disorder (e.g., major depression)   9, Any anxiety disorder (e.g., panic disorder, generalized anxiety disorder, post-traumatic stress disorder)   10, None of the above medical conditions | [directory_1] = '1' and ([directory_2] = '1' or [directory_2] = '3') | y |
| knowledge_4         | Who can get the COVID-19?                                                                           | 1, Older adults   2, Young children   3, People with underlying health conditions (heart disease, lung disease, etc.)   4, Men   5, Health care workers   6, Anyone can get COVID-19                                                                                                                                                                                                                                                                                                                                                                                                                                                                                 | [directory_1] = '1' and ([directory_2] = '1' or [directory_2] = '3') | y |
| knowledge_5         | Does everybody who has COVID-19 show symptoms?                                                      | 1, Yes   2, No   3, Not sure                                                                                                                                                                                                                                                                                                                                                                                                                                                                                                                                                                                                                                         | [directory_1] = '1' and ([directory_2] = '1' or [directory_2] = '3') | y |

|                            |                                                                                                                                                                    |                                                                                                                                          |                                                                      |   |
|----------------------------|--------------------------------------------------------------------------------------------------------------------------------------------------------------------|------------------------------------------------------------------------------------------------------------------------------------------|----------------------------------------------------------------------|---|
| knowledge_6                | As far as you know, if someone thinks they are having COVID-19 symptoms, what should they do?                                                                      | 1, Stay home and call a doctor or medical provider   2, Seek care immediately at an ER or urgent care facility                           | [directory_1] = '1' and ([directory_2] = '1' or [directory_2] = '3') | y |
| knowledge_7                | Are there travel restrictions in effect in your area? Restrictions can include stay-at-home, shelter-in-place, healthy-at-home, essential travel or curfew orders. | 1, Yes, a restriction is in effect   2, No, a restriction was issued but has ended   3, No, a restriction was never issued   4, Not sure | [directory_1] = '1' and ([directory_2] = '1' or [directory_2] = '3') | y |
| attitudes_8                | As a result of the coronavirus, would you say your personal life has...                                                                                            | 1, Changed in a major way   2, Changed, but only a little bit   3, Stayed about the same                                                 | [directory_1] = '1' and ([directory_2] = '1' or [directory_2] = '3') | y |
| attitudes_9_self           | Being infected myself                                                                                                                                              | 1, To a Great Extent   2, Somewhat   3, Very Little   4, Not at All   5, I don't know/I prefer not to answer/Not applicable              | [directory_1] = '1' and ([directory_2] = '1' or [directory_2] = '3') | y |
| attitudes_9_increased_risk | Being at an increased risk of infection because of my Parkinson's                                                                                                  | 1, To a Great Extent   2, Somewhat   3, Very Little   4, Not at All   5, I don't know/I prefer not to answer/Not applicable              | [directory_1] = '1' and ([directory_2] = '1' or [directory_2] = '3') | y |
| attitudes_9_intensive_care | Being infected and requiring intensive hospital care (mechanical ventilation or a breathing machine)                                                               | 1, To a Great Extent   2, Somewhat   3, Very Little   4, Not at All   5, I don't know/I prefer not to answer/Not applicable              | [directory_1] = '1' and ([directory_2] = '1' or [directory_2] = '3') | y |
| attitudes_9_death          | Being infected and dying                                                                                                                                           | 1, To a Great Extent   2, Somewhat   3, Very Little   4, Not at All   5, I don't know/I prefer not to answer/Not applicable              | [directory_1] = '1' and ([directory_2] = '1' or [directory_2] = '3') | y |
| attitudes_9_hospital_other | Requiring hospitalization for other non-COVID-19 related health complications                                                                                      | 1, To a Great Extent   2, Somewhat   3, Very Little   4, Not at All   5, I don't know/I prefer not to answer/Not applicable              | [directory_1] = '1' and ([directory_2] = '1' or [directory_2] = '3') | y |
| attitudes_9_not_soc_dis    | Not being able to social distance because of required assistance due to Parkinson's                                                                                | 1, To a Great Extent   2, Somewhat   3, Very Little   4, Not at All   5, I don't know/I prefer not to answer/Not applicable              | [directory_1] = '1' and ([directory_2] = '1' or [directory_2] = '3') | y |
| attitudes_9_pd_meds        | Running out of Parkinson's medications                                                                                                                             | 1, To a Great Extent   2, Somewhat   3, Very Little   4, Not at All   5, I don't                                                         | [directory_1] = '1' and ([directory_2] = '1' or [directory_2] = '3') | y |

|                              |                                                                                                                                               |                                                                                                                             |                                                                          |   |
|------------------------------|-----------------------------------------------------------------------------------------------------------------------------------------------|-----------------------------------------------------------------------------------------------------------------------------|--------------------------------------------------------------------------|---|
|                              |                                                                                                                                               | know/I prefer not to answer/Not applicable                                                                                  |                                                                          |   |
| attitudes_9_money            | Not having enough money for living expenses                                                                                                   | 1, To a Great Extent   2, Somewhat   3, Very Little   4, Not at All   5, I don't know/I prefer not to answer/Not applicable |                                                                          | y |
| attitudes_9_time             | How long it will take for things to go back to normal                                                                                         | 1, To a Great Extent   2, Somewhat   3, Very Little   4, Not at All   5, I don't know/I prefer not to answer/Not applicable | [directory_1] = '1' and ([directory_2] = '1' or [directory_2] = '3')     | y |
| attitudes_10_nervous         | Feeling nervous, anxious, or on edge                                                                                                          | 1, Nearly every day   2, More than half the days   3, Several days   4, Not at all                                          | [directory_1] = '1' and ([directory_2] = '1' or [directory_2] = '3')     | y |
| attitudes_10_worry           | Not being able to stop or control worrying                                                                                                    | 1, Nearly every day   2, More than half the days   3, Several days   4, Not at all                                          | [directory_1] = '1' and ([directory_2] = '1' or [directory_2] = '3')     | y |
| attitudes_10_depressed       | Feeling down, depressed, or hopeless                                                                                                          | 1, Nearly every day   2, More than half the days   3, Several days   4, Not at all                                          | [directory_1] = '1' and ([directory_2] = '1' or [directory_2] = '3')     | y |
| attitudes_10_loss_interest   | Little interest or pleasure in doing things                                                                                                   | 1, Nearly every day   2, More than half the days   3, Several days   4, Not at all                                          | [directory_1] = '1' and ([directory_2] = '1' or [directory_2] = '3')     | y |
| attitudes_10_sleep           | Had sleep interruptions or disturbances                                                                                                       | 1, Nearly every day   2, More than half the days   3, Several days   4, Not at all                                          | [directory_1] = '1' and ([directory_2] = '1' or [directory_2] = '3')     | y |
| attitudes_10_isolated        | Feeling isolated, left out or alone                                                                                                           | 1, Nearly every day   2, More than half the days   3, Several days   4, Not at all                                          | [directory_1] = '1' and ([directory_2] = '1' or [directory_2] = '3')     | y |
| attitudes_10_1_nervous       | In what ways do you feel that disruptions caused by the coronavirus outbreak have contributed to feeling nervous, anxious, or on edge?        |                                                                                                                             | [attitudes_10_nervous] = '1' or [attitudes_10_nervous] = '2'             |   |
| attitudes_10_1_worry         | In what ways do you feel that disruptions caused by the coronavirus outbreak have contributed to not being able to stop or control worrying?  |                                                                                                                             | [attitudes_10_worry] = '1' or [attitudes_10_worry] = '2'                 |   |
| attitudes_10_1_depressed     | In what ways do you feel that disruptions caused by the coronavirus outbreak have contributed to feeling down, depressed, or hopeless?        |                                                                                                                             | [attitudes_10_depressed] = '1' or [attitudes_10_depressed] = '2'         |   |
| attitudes_10_1_loss_interest | In what ways do you feel that disruptions caused by the coronavirus outbreak have contributed to little interest or pleasure in doing things? |                                                                                                                             | [attitudes_10_loss_interest] = '1' or [attitudes_10_loss_interest] = '2' |   |
| attitudes_10_1_sleep         | In what ways do you feel that disruptions caused by the coronavirus outbreak have contributed to sleep interruptions or disturbances?         |                                                                                                                             | [attitudes_10_sleep] = '2' or [attitudes_10_sleep] = '1'                 |   |
| attitudes_10_1_isolated      | In what ways do you feel that disruptions caused by the coronavirus outbreak have contributed to feeling isolated, left out or alone?         |                                                                                                                             | [attitudes_10_isolated] = '1' or [attitudes_10_isolated] = '2'           |   |

|                             |                                                                                                                                                                   |                                                                                                                                                                                                                                                              |                                                                      |   |
|-----------------------------|-------------------------------------------------------------------------------------------------------------------------------------------------------------------|--------------------------------------------------------------------------------------------------------------------------------------------------------------------------------------------------------------------------------------------------------------|----------------------------------------------------------------------|---|
| attitudes_11                | During the last six weeks, have you noticed a change in your Parkinson's disease symptoms?                                                                        | 1, Yes, major negative change   2, Yes, minor negative change   3, Yes, major positive change   4, Yes, minor positive change   5, No, Parkinson's disease symptoms have remained about the same   6, Not sure                                               | [directory_1] = '1' and ([directory_2] = '1' or [directory_2] = '3') | y |
| attitudes_11_1              | In what ways do you feel that the disruptions caused by the coronavirus outbreak have contributed to negative changes in your Parkinson's disease symptoms?       |                                                                                                                                                                                                                                                              | [attitudes_11] = '1'                                                 | y |
| attitudes_12                | During the last six weeks, have you noticed a change in your relationships with members of your household?                                                        | 1, Yes, major negative change   2, Yes, minor negative change   3, Yes, major positive change   4, Yes, minor positive change   5, No, relationships with members of my household have remained about the same   6, Not sure   7, I live alone   8, Not sure | [directory_1] = '1' and ([directory_2] = '1' or [directory_2] = '3') | y |
| attitudes_12_1              | In what ways do you feel that the disruptions caused by the coronavirus has contributed to negative changes in your relationships with members of your household? |                                                                                                                                                                                                                                                              | [attitudes_12] = '1'                                                 | y |
| attitudes_13                | Are there things that you don't understand or that confuse you about the coronavirus?                                                                             | 1, Yes   2, No   3, Not sure                                                                                                                                                                                                                                 | [directory_1] = '1' and ([directory_2] = '1' or [directory_2] = '3') | y |
| attitudes_13_1              | What is it that you don't understand, or what confuses you about the coronavirus?                                                                                 |                                                                                                                                                                                                                                                              | [attitudes_13] = '1'                                                 | y |
| attitudes_14                | What additional information or resources would be most helpful to you at this time?                                                                               |                                                                                                                                                                                                                                                              | [directory_1] = '1' and ([directory_2] = '1' or [directory_2] = '3') |   |
| practices_16_travel         | Canceled or postponed air travel for work or pleasure                                                                                                             | 1, Yes   2, No   3, Not applicable                                                                                                                                                                                                                           | [directory_1] = '1' and ([directory_2] = '1' or [directory_2] = '3') | y |
| practices_16_activities     | Canceled or postponed personal or social activities                                                                                                               | 1, Yes   2, No   3, Not applicable                                                                                                                                                                                                                           | [directory_1] = '1' and ([directory_2] = '1' or [directory_2] = '3') | y |
| practices_16_doctor         | Visited a doctor                                                                                                                                                  | 1, Yes   2, No   3, Not applicable                                                                                                                                                                                                                           | [directory_1] = '1' and ([directory_2] = '1' or [directory_2] = '3') | y |
| practices_16_cancelled_appt | Canceled a doctor's appointment                                                                                                                                   | 1, Yes   2, No   3, Not applicable                                                                                                                                                                                                                           | [directory_1] = '1' and ([directory_2] = '1' or [directory_2] = '3') | y |

|                               |                                                                                                                                                                                                                             |                                                                                                                                   |                                                                                                    |   |
|-------------------------------|-----------------------------------------------------------------------------------------------------------------------------------------------------------------------------------------------------------------------------|-----------------------------------------------------------------------------------------------------------------------------------|----------------------------------------------------------------------------------------------------|---|
| practices_16_food             | Stockpiled food or water                                                                                                                                                                                                    | 1, Yes   2, No   3, Not applicable                                                                                                | [directory_1] = '1' and<br>([directory_2] = '1' or<br>[directory_2] = '3')                         | y |
| practices_16_avoid_people     | Avoided contact with people who could be high-risk                                                                                                                                                                          | 1, Yes   2, No   3, Not applicable                                                                                                | [directory_1] = '1' and<br>([directory_2] = '1' or<br>[directory_2] = '3')                         | y |
| practices_16_avoid_places     | Avoided public spaces, gatherings, or crowds                                                                                                                                                                                | 1, Yes   2, No   3, Not applicable                                                                                                | [directory_1] = '1' and<br>([directory_2] = '1' or<br>[directory_2] = '3')                         | y |
| practices_16_avoid_restaurant | Avoided eating at restaurants                                                                                                                                                                                               | 1, Yes   2, No   3, Not applicable                                                                                                | [directory_1] = '1' and<br>([directory_2] = '1' or<br>[directory_2] = '3')                         | y |
| practices_16_pray             | Prayed                                                                                                                                                                                                                      | 1, Yes   2, No   3, Not applicable                                                                                                | [directory_1] = '1' and<br>([directory_2] = '1' or<br>[directory_2] = '3')                         | y |
| practices_16_pd_meds          | Obtained a three-month supply of Parkinson's prescription medications                                                                                                                                                       | 1, Yes   2, No   3, Not applicable                                                                                                | [directory_1] = '1' and<br>([directory_2] = '1' or<br>[directory_2] = '3')                         | y |
| practices_16_other_meds       | Obtained a three-month supply of other essential prescription medications                                                                                                                                                   | 1, Yes   2, No   3, Not applicable                                                                                                | [directory_1] = '1' and<br>([directory_2] = '1' or<br>[directory_2] = '3')                         | y |
| practices_16_wfh              | Worked or studied at home                                                                                                                                                                                                   | 1, Yes   2, No   3, Not applicable                                                                                                | [directory_1] = '1' and<br>([directory_2] = '1' or<br>[directory_2] = '3')                         | y |
| practices_16_mask             | Worn a mask or other face covering                                                                                                                                                                                          | 1, Yes   2, No   3, Not applicable                                                                                                | [directory_1] = '1' and<br>([directory_2] = '1' or<br>[directory_2] = '3')                         | y |
| practices_16_1                | <div class="rich-text-field-label"><p>Were you unable to get any of the following items as a result of the coronavirus outbreak? <em><span style="font-weight: normal;">Please select all that apply.</span></em></p></div> | 1, Prescription medications for Parkinson's disease   2, Other prescription medications   3, Groceries   4, Other necessary items | [practices_16_pd_meds] = '2' or<br>[practices_16_other_meds] = '2' or<br>[practices_16_food] = '2' |   |
| practices_17                  | Has anything prevented you from following the CDC and government social distancing and                                                                                                                                      | 1, Yes   2, No                                                                                                                    | [directory_1] = '1' and<br>([directory_2] = '1' or<br>[directory_2] = '3')                         | y |

|                |                                                                                                                                                                                                                                                                               |                                                                                                                                                             |                                                                      |   |
|----------------|-------------------------------------------------------------------------------------------------------------------------------------------------------------------------------------------------------------------------------------------------------------------------------|-------------------------------------------------------------------------------------------------------------------------------------------------------------|----------------------------------------------------------------------|---|
|                | coronavirus health recommendations?                                                                                                                                                                                                                                           |                                                                                                                                                             |                                                                      |   |
| practices_17_1 | What has prevented you from following the CDC and government social distancing and coronavirus health recommendations?                                                                                                                                                        |                                                                                                                                                             | [practices_17] = '1'                                                 | y |
| practices_18   | Prior to the coronavirus outbreak, approximately how many hours per week did you exercise?                                                                                                                                                                                    | 1, I did not exercise   2, <1 hour per week   3, 1-3 hours per week   4, 4-6 hours per week   5, 7-9 hours per week   6, 10+ hours per week                 | [directory_1] = '1' and ([directory_2] = '1' or [directory_2] = '3') | y |
| practices_19   | During the last six weeks, approximately how many hours per week have you exercised?                                                                                                                                                                                          | 1, I did not exercise   2, < 1 hour per week   3, 1-3 hours per week   4, 4-6 hours per week   5, 7-9 hours per week   6, 10+ hours per week                | [directory_1] = '1' and ([directory_2] = '1' or [directory_2] = '3') | y |
| practices_20   | Prior to the coronavirus outbreak, approximately how many hours per week did you participate in activities outside of your residence? Activities can include exercise or wellness classes, support groups, recreational classes, religious services, educational events, etc. | 1, I did not leave my residence   2, < 1 hour per week   3, 1-5 hours per week   4, 6-10 hours per week   5, 11-15 hours per week   6, 16+ hours per week   | [directory_1] = '1' and ([directory_2] = '1' or [directory_2] = '3') | y |
| practices_21   | During the last six weeks, approximately how many hours per week did you participate in activities outside of your residence? Activities can include exercise or wellness classes, support groups, recreational classes, religious services, educational events, etc.         | 1, I did not leave my residence   2, < 1 hour per week   3, 1-5 hours per week   4, 6-10 hours per week   5, 11-15 hours per week   6, 16+ hours per week   | [directory_1] = '1' and ([directory_2] = '1' or [directory_2] = '3') | y |
| practices_22   | Compared to the months before the outbreak began, how has the frequency of your communication with close friends and family changed?                                                                                                                                          | 1, I communicate with them more often than before   2, I communicate with them about the same as before   3, I communicate with them less often than before | [directory_1] = '1' and ([directory_2] = '1' or [directory_2] = '3') | y |
| practices_23   | Who is providing you with social support during the coronavirus outbreak? Please select all that apply.                                                                                                                                                                       | 1, Someone in my household or residence   2, Friend or family who comes to my place   3, Friend or family who I talk to on the phone (or video              | [directory_1] = '1' and ([directory_2] = '1' or [directory_2] = '3') | y |

|                      |                                                                                                                                                                                                                                                                              |                                                                                                                                                                    |                                                                               |   |
|----------------------|------------------------------------------------------------------------------------------------------------------------------------------------------------------------------------------------------------------------------------------------------------------------------|--------------------------------------------------------------------------------------------------------------------------------------------------------------------|-------------------------------------------------------------------------------|---|
|                      |                                                                                                                                                                                                                                                                              | chat)   4, Other   5, I do not have support                                                                                                                        |                                                                               |   |
| practices_23_1       | Who else is providing you with social support during the outbreak?                                                                                                                                                                                                           |                                                                                                                                                                    | [practices_23(4)] = '1'                                                       | y |
| telehealth_24        | Were any of the activities you would participate in previous to the coronavirus outbreak transitioned to a virtual or online format? Activities can include exercise or wellness classes, support groups, recreational classes, religious services, educational events, etc. | 1, All   2, Some   3, Few   4, None                                                                                                                                | [directory_1] = '1' and ([directory_2] = '1' or [directory_2] = '3')          | y |
| telehealth_24_1      | Have you participated in those activities in a virtual or online format?                                                                                                                                                                                                     | 1, All   2, Some   3, Few   4, None                                                                                                                                | [telehealth_24] = '1' or [telehealth_24] = '2' or [telehealth_24] = '3'       | y |
| telehealth_24_2      | During the last six weeks, in what activities have you participated in a virtual or online format? Please select all that apply.                                                                                                                                             | 1, Exercise or wellness classes   2, Support groups   3, Recreational classes (art, dance, drama, etc.)   4, Religious services   5, Educational events   6, Other | [telehealth_24_1] = '1' or [telehealth_24_1] = '2' or [telehealth_24_1] = '3' | y |
| telehealth_24_2_1    | In what other activities have you participated in a virtual or online format?                                                                                                                                                                                                |                                                                                                                                                                    | [telehealth_24_2(6)] = '1'                                                    | y |
| telehealth_25        | How long has it been since you last visited (in person appointment) the doctor or medical provider you see most often for treatment related to your Parkinson's?                                                                                                             | 1, Less than one month   2, 1 to 3 months   3, 4 to 6 months   4, 7 to 12 months   5, More than 12 months                                                          | [directory_1] = '1' and ([directory_2] = '1' or [directory_2] = '3')          | y |
| telehealth_26_doctor | Doctor or medical provider                                                                                                                                                                                                                                                   | 2, 1 appointment   3, 2 appointments   4, 3 to 5 appointments   5, 6 or more appointments   1, I did not receive this care via telehealth or virtual appointments  | [directory_1] = '1' and ([directory_2] = '1' or [directory_2] = '3')          | y |
| telehealth_26_pt     | Physical therapist                                                                                                                                                                                                                                                           | 2, 1 appointment   3, 2 appointments   4, 3 to 5 appointments   5, 6 or more appointments   1, I did not receive this care via telehealth or virtual appointments  | [directory_1] = '1' and ([directory_2] = '1' or [directory_2] = '3')          | y |



|                        |                                                                                                  |                                                                                                                                                                   |                                                                                                                              |   |
|------------------------|--------------------------------------------------------------------------------------------------|-------------------------------------------------------------------------------------------------------------------------------------------------------------------|------------------------------------------------------------------------------------------------------------------------------|---|
| telehealth_26_ot       | Occupational therapist                                                                           | 2, 1 appointment   3, 2 appointments   4, 3 to 5 appointments   5, 6 or more appointments   1, I did not receive this care via telehealth or virtual appointments | [directory_1] = '1' and ([directory_2] = '1' or [directory_2] = '3')                                                         | y |
| telehealth_26_slp      | Speech and language pathologist                                                                  | 2, 1 appointment   3, 2 appointments   4, 3 to 5 appointments   5, 6 or more appointments   1, I did not receive this care via telehealth or virtual appointments | [directory_1] = '1' and ([directory_2] = '1' or [directory_2] = '3')                                                         | y |
| telehealth_26_mental   | Mental health therapist                                                                          | 2, 1 appointment   3, 2 appointments   4, 3 to 5 appointments   5, 6 or more appointments   1, I did not receive this care via telehealth or virtual appointments | [directory_1] = '1' and ([directory_2] = '1' or [directory_2] = '3')                                                         | y |
| telehealth_26_2_doctor | How was this telehealth or virtual appointment with a doctor of medical provider conducted?      | 1, Over a video sharing app on your smart phone   2, Over video on a computer   3, Over the phone with audio only   4, Other                                      | [telehealth_26_doctor] = '2' or [telehealth_26_doctor] = '3' or [telehealth_26_doctor] = '4' or [telehealth_26_doctor] = '5' | y |
| telehealth_26_2_pt     | How was this telehealth or virtual appointment with a physical therapist conducted?              | 1, Over a video sharing app on your smart phone   2, Over video on a computer   3, Over the phone with audio only   4, Other                                      | [telehealth_26_pt] = '2' or [telehealth_26_pt] = '3' or [telehealth_26_pt] = '4' or [telehealth_26_pt] = '5'                 | y |
| telehealth_26_2_ot     | How was this telehealth or virtual appointment with an occupational therapist conducted?         | 1, Over a video sharing app on your smart phone   2, Over video on a computer   3, Over the phone with audio only   4, Other                                      | [telehealth_26_ot] = '2' or [telehealth_26_ot] = '3' or [telehealth_26_ot] = '4' or [telehealth_26_ot] = '5'                 | y |
| telehealth_26_2_slp    | How was this telehealth or virtual appointment with a speech and language pathologist conducted? | 1, Over a video sharing app on your smart phone   2, Over video on a computer   3, Over the phone with audio only   4, Other                                      | [telehealth_26_slp] = '2' or [telehealth_26_slp] = '3' or [telehealth_26_slp] = '4' or [telehealth_26_slp] = '5'             | y |
| telehealth_26_2_mental | How was this telehealth or virtual appointment with a mental health therapist conducted?         | 1, Over a video sharing app on your smart phone   2, Over video on a computer   3, Over the phone with audio only   4, Other                                      | [telehealth_26_mental] = '2' or [telehealth_26_mental] = '3' or [telehealth_26_mental] = '4' or [telehealth_26_mental] = '5' | y |
| telehealth_26_3_doctor | Were any of your telehealth or virtual appointments related to                                   | 1, Routine visit for Parkinson's disease   2, Urgent visit for Parkinson's disease                                                                                | [telehealth_26_doctor] = '2' or [telehealth_26_doctor] =                                                                     | y |

|                 |                                                                                                                                           |                                                                                                                                                                                                                                                                                                                                                            |                                                                                                                                                                                                                                                                                                                                                                                                                                                                                                                                                                                                                  |   |
|-----------------|-------------------------------------------------------------------------------------------------------------------------------------------|------------------------------------------------------------------------------------------------------------------------------------------------------------------------------------------------------------------------------------------------------------------------------------------------------------------------------------------------------------|------------------------------------------------------------------------------------------------------------------------------------------------------------------------------------------------------------------------------------------------------------------------------------------------------------------------------------------------------------------------------------------------------------------------------------------------------------------------------------------------------------------------------------------------------------------------------------------------------------------|---|
|                 | any of the following medical issues?                                                                                                      | 3, Corona virus symptoms, either to diagnosis or to rule out   4, Other urgent health situation   5, None of the above                                                                                                                                                                                                                                     | '3' or [telehealth_26_doctor] = '4' or [telehealth_26_doctor] = '5'                                                                                                                                                                                                                                                                                                                                                                                                                                                                                                                                              |   |
| telehealth_26_4 | Were you provided support or instructions on how to use telehealth or virtual services for this appointment?                              | 1, I was provided support (by medical staff or someone familiar with technology)   2, I was provided instructions   3, I was provided both support and instructions   4, I was not provided support or instructions                                                                                                                                        | [telehealth_26_doctor] = '2' or [telehealth_26_doctor] = '3' or [telehealth_26_doctor] = '4' or [telehealth_26_doctor] = '5' or [telehealth_26_pt] = '2' or [telehealth_26_pt] = '3' or [telehealth_26_pt] = '4' or [telehealth_26_pt] = '5' or [telehealth_26_ot] = '2' or [telehealth_26_ot] = '3' or [telehealth_26_ot] = '4' or [telehealth_26_ot] = '5' or [telehealth_26_slp] = '2' or [telehealth_26_slp] = '3' or [telehealth_26_slp] = '4' or [telehealth_26_slp] = '5' or [telehealth_26_mental] = '2' or [telehealth_26_mental] = '3' or [telehealth_26_mental] = '4' or [telehealth_26_mental] = '5' | y |
| telehealth_26_5 | Has a care partner, friend or family member been helping you with your telehealth or virtual medical appointments? Select all that apply. | 1, Yes, holding the phone or device for me   2, Yes, helping me with the technology (logging in, setting up audio or video, etc.)   3, Yes, communicating with my doctor for or with me   4, Yes, taking notes while my doctor is speaking   5, Yes, other   6, No, I am attending telehealth or virtual medical appointments on my own with no assistance | [telehealth_26_doctor] = '2' or [telehealth_26_doctor] = '3' or [telehealth_26_doctor] = '4' or [telehealth_26_doctor] = '5' or [telehealth_26_pt] = '2' or [telehealth_26_pt] = '3' or [telehealth_26_pt] = '4' or [telehealth_26_pt] = '5' or [telehealth_26_ot] = '2' or [telehealth_26_ot] = '3' or [telehealth_26_ot] = '4' or [telehealth_26_ot] = '5' or [telehealth_26_slp] = '2' or                                                                                                                                                                                                                     | y |

|                      |                                                                                                                                                            |                                                                                                                                                                                                                                                              |                                                                                                                                                                                                                                          |   |
|----------------------|------------------------------------------------------------------------------------------------------------------------------------------------------------|--------------------------------------------------------------------------------------------------------------------------------------------------------------------------------------------------------------------------------------------------------------|------------------------------------------------------------------------------------------------------------------------------------------------------------------------------------------------------------------------------------------|---|
|                      |                                                                                                                                                            |                                                                                                                                                                                                                                                              | [telehealth_26_slp] = '3' or<br>[telehealth_26_slp] = '4' or<br>[telehealth_26_slp] = '5' or<br>[telehealth_26_mental] = '2'<br>or [telehealth_26_mental] =<br>'3' or [telehealth_26_mental]<br>= '4' or<br>[telehealth_26_mental] = '5' |   |
| telehealth_27        | Prior to the coronavirus outbreak, had you used telehealth or virtual medical appointments before?                                                         | 1, Yes   2, No   3, Not sure                                                                                                                                                                                                                                 | [directory_1] = '1' and<br>([directory_2] = '1' or<br>[directory_2] = '3')                                                                                                                                                               | y |
| telehealth_27_1      | Were you provided with telehealth or virtual medical appointment options for the appointments you were required to cancel due to the coronavirus outbreak? | 1, Yes, and I participated in the telehealth or virtual medical appointment   2, Yes, but I did not participate in the telehealth or virtual medical appointment   3, No, I was not provided telehealth or virtual medical appointment options   4, Not sure | [practices_16_cancelled_apt] = '1'                                                                                                                                                                                                       | y |
| telehealth_28_doctor | Doctor or medical provider                                                                                                                                 | 1, More satisfied   2, Equally satisfied   3, Less satisfied   4, I'm not sure   5, I did not receive this care via telehealth or virtual appointments                                                                                                       | [directory_1] = '1' and<br>([directory_2] = '1' or<br>[directory_2] = '3')                                                                                                                                                               | y |
| telehealth_28_pt     | Physical therapist                                                                                                                                         | 1, More satisfied   2, Equally satisfied   3, Less satisfied   4, I'm not sure   5, I did not receive this care via telehealth or virtual appointments                                                                                                       | [directory_1] = '1' and<br>([directory_2] = '1' or<br>[directory_2] = '3')                                                                                                                                                               | y |
| telehealth_28_ot     | Occupational therapist                                                                                                                                     | 1, More satisfied   2, Equally satisfied   3, Less satisfied   4, I'm not sure   5, I did not receive this care via telehealth or virtual appointments                                                                                                       | [directory_1] = '1' and<br>([directory_2] = '1' or<br>[directory_2] = '3')                                                                                                                                                               | y |
| telehealth_28_slp    | Speech and language pathologist                                                                                                                            | 1, More satisfied   2, Equally satisfied   3, Less satisfied   4, I'm not sure   5, I did not receive this care via telehealth or virtual appointments                                                                                                       | [directory_1] = '1' and<br>([directory_2] = '1' or<br>[directory_2] = '3')                                                                                                                                                               | y |
| telehealth_28_mental | Mental health therapist                                                                                                                                    | 1, More satisfied   2, Equally satisfied   3, Less satisfied   4, I'm not sure   5, I did not receive this care via telehealth or virtual appointments                                                                                                       | [directory_1] = '1' and<br>([directory_2] = '1' or<br>[directory_2] = '3')                                                                                                                                                               | y |

|                   |                                                                                                                                  |                                                                                                                                                                                                                                                                                                                                                                                                                                                                 |                                                                                                                                                                                                                                                                                                                                                                                                                                                                                                                                                                                                                                                                                             |   |
|-------------------|----------------------------------------------------------------------------------------------------------------------------------|-----------------------------------------------------------------------------------------------------------------------------------------------------------------------------------------------------------------------------------------------------------------------------------------------------------------------------------------------------------------------------------------------------------------------------------------------------------------|---------------------------------------------------------------------------------------------------------------------------------------------------------------------------------------------------------------------------------------------------------------------------------------------------------------------------------------------------------------------------------------------------------------------------------------------------------------------------------------------------------------------------------------------------------------------------------------------------------------------------------------------------------------------------------------------|---|
| telehealth_29     | How frequently would you prefer to continue telehealth or virtual medical appointments after the coronavirus outbreak has ended? | 1, Always, I prefer to only use telehealth or virtual medical appointments moving forward   2, Sometimes, I prefer to use telehealth or virtual medical appointments as a replacement to some of my in-person appointments moving forward   3, Rarely, I prefer to have in-person appointments and only use telehealth or virtual medical appointments as a replacement when absolutely necessary   4, Never, I prefer to return to in-person appointments only | [directory_1] = '1' and ([directory_2] = '1' or [directory_2] = '3') and ([telehealth_26_doctor] = '2' or [telehealth_26_doctor] = '3' or [telehealth_26_doctor] = '4' or [telehealth_26_doctor] = '5' or [telehealth_26_pt] = '2' or [telehealth_26_pt] = '3' or [telehealth_26_pt] = '4' or [telehealth_26_pt] = '5' or [telehealth_26_ot] = '2' or [telehealth_26_ot] = '3' or [telehealth_26_ot] = '4' or [telehealth_26_ot] = '5' or [telehealth_26_slp] = '2' or [telehealth_26_slp] = '3' or [telehealth_26_slp] = '4' or [telehealth_26_slp] = '5' or [telehealth_26_mental] = '2' or [telehealth_26_mental] = '3' or [telehealth_26_mental] = '4' or [telehealth_26_mental] = '5') | y |
| telehealth_29_1   | For what reasons do you prefer in person medical appointments to telehealth or virtual medical appointments?                     | 1, In person medical appointment are more convenient than telehealth or virtual appointments   2, In person appointments have higher quality of care than telehealth or virtual appointments   3, There are too many technical challenges with telehealth or virtual appointments   4, Other                                                                                                                                                                    | [telehealth_29] = '3' or [telehealth_29] = '4'                                                                                                                                                                                                                                                                                                                                                                                                                                                                                                                                                                                                                                              | y |
| telehealth_29_1_1 | For what other reason do you prefer in person medical appointments to telehealth or virtual medical appointments?                |                                                                                                                                                                                                                                                                                                                                                                                                                                                                 | [telehealth_29_1] = '4'                                                                                                                                                                                                                                                                                                                                                                                                                                                                                                                                                                                                                                                                     | y |
| demographics_a    | In what year were you born?                                                                                                      | 1915, 1915   1916, 1916   1917, 1917   1918, 1918   1919, 1919   1920, 1920   1921, 1921   1922, 1922   1923, 1923   1924, 1924   1925, 1925   1926, 1926   1927, 1927   1928,                                                                                                                                                                                                                                                                                  | [directory_1] = '1' and ([directory_2] = '1' or [directory_2] = '3')                                                                                                                                                                                                                                                                                                                                                                                                                                                                                                                                                                                                                        | y |

|                |                                                      |                                                                                                                                                                                                                                                                                                                                                                                                                                                                                                                                                                                                                                                                                                                                                                                                                                                                                                                                                                                     |                                                                      |   |
|----------------|------------------------------------------------------|-------------------------------------------------------------------------------------------------------------------------------------------------------------------------------------------------------------------------------------------------------------------------------------------------------------------------------------------------------------------------------------------------------------------------------------------------------------------------------------------------------------------------------------------------------------------------------------------------------------------------------------------------------------------------------------------------------------------------------------------------------------------------------------------------------------------------------------------------------------------------------------------------------------------------------------------------------------------------------------|----------------------------------------------------------------------|---|
|                |                                                      | <p>1928   1929, 1929   1930, 1930   1931, 1931   1932, 1932   1933, 1933   1934, 1934   1935, 1935   1936, 1936   1937, 1937   1938, 1938   1939, 1939   1940, 1940   1941, 1941   1942, 1942   1943, 1943   1944, 1944   1945, 1945   1946, 1946   1947, 1947   1948, 1948   1949, 1949   1950, 1950   1951, 1951   1952, 1952   1953, 1953   1954, 1954   1955, 1955   1956, 1956   1957, 1957   1958, 1958   1959, 1959   1960, 1960   1961, 1961   1962, 1962   1963, 1963   1964, 1964   1965, 1965   1966, 1966   1967, 1967   1968, 1968   1969, 1969   1970, 1970   1971, 1971   1972, 1972   1973, 1973   1974, 1974   1975, 1975   1976, 1976   1977, 1977   1978, 1978   1979, 1979   1980, 1980   1981, 1981   1982, 1982   1983, 1983   1984, 1984   1985, 1985   1986, 1986   1987, 1987   1988, 1988   1989, 1989   1990, 1990   1991, 1991   1992, 1992   1993, 1993   1994, 1994   1995, 1995   1996, 1996   1997, 1997   1998, 1998   1999, 1999   2000, 2000</p> |                                                                      |   |
| demographics_b | In what year were you diagnosed Parkinson's disease? | <p>1, Prior to 1950   1950, 1950   1951, 1951   1952, 1952   1953, 1953   1954, 1954   1955, 1955   1956, 1956   1957, 1957   1958, 1958   1959, 1959   1960, 1960   1961, 1961   1962, 1962   1963, 1963   1964, 1964   1965, 1965   1966, 1966   1967, 1967   1968, 1968   1969, 1969   1970, 1970   1971, 1971   1972, 1972   1973, 1973   1974, 1974   1975, 1975   1976, 1976   1977, 1977   1978, 1978   1979, 1979   1980, 1980</p>                                                                                                                                                                                                                                                                                                                                                                                                                                                                                                                                          | [directory_1] = '1' and ([directory_2] = '1' or [directory_2] = '3') | y |

|                |                                                                                                    |                                                                                                                                                                                                                                                                                                                                                                                                                                                                                                                                       |                                                                      |   |
|----------------|----------------------------------------------------------------------------------------------------|---------------------------------------------------------------------------------------------------------------------------------------------------------------------------------------------------------------------------------------------------------------------------------------------------------------------------------------------------------------------------------------------------------------------------------------------------------------------------------------------------------------------------------------|----------------------------------------------------------------------|---|
|                |                                                                                                    | 1981, 1981   1982, 1982   1983, 1983   1984, 1984   1985, 1985   1986, 1986   1987, 1987   1988, 1988   1989, 1989   1990, 1990   1991, 1991   1992, 1992   1993, 1993   1994, 1994   1995, 1995   1996, 1996   1997, 1997   1998, 1998   1999, 1999   2000, 2000   2001, 2001   2002, 2002   2003, 2003   2004, 2004   2005, 2005   2006, 2006   2007, 2007   2008, 2008   2009, 2009   2010, 2010   2011, 2011   2012, 2012   2013, 2013   2014, 2014   2015, 2015   2016, 2016   2017, 2017   2018, 2018   2019, 2019   2020, 2020 |                                                                      |   |
| demographics_c | What medications do you currently take for your Parkinson's disease? Please select all that apply. | 1, L-Dopa (Medications include: Sinemet, Sinemet CR, Parcopa, Stalevo, Rytary, Duopa)   2, Dopamine Agonists (Medications include: Apokyn, Parlodel, Mirapex, Mirapex ER, Requip, Requip XLTM, Neupro)   3, COMT Inhibitors (Medications include: Comtan, Tasmar)   4, MAO-B Inhibitors (Azilect, Eldepryl, Zelapar, Xadago)   5, Anticholinergics (Medications include: Cogentin, Artane)   6, Other (Medications include: Gocovri, Northera, Nuplazid, Exelon)   7, I do not currently take medications for my Parkinson's disease  | [directory_1] = '1' and ([directory_2] = '1' or [directory_2] = '3') | y |
| demographics_d | Do you have a care partner or caregiver?                                                           | 1, Yes   2, No                                                                                                                                                                                                                                                                                                                                                                                                                                                                                                                        | [directory_1] = '1' and ([directory_2] = '1' or [directory_2] = '3') | y |
| demographics_e | What is your marital status?                                                                       | 1, Single (never married)   2, Married or domestic partnership   3, Separated   4, Widowed   5, Divorced                                                                                                                                                                                                                                                                                                                                                                                                                              | [directory_1] = '1' and ([directory_2] = '1' or [directory_2] = '3') | y |
| demographics_f | Please select the gender you identify with:                                                        | 1, Male   2, Female   3, Other   4, Prefer to not answer                                                                                                                                                                                                                                                                                                                                                                                                                                                                              | [directory_1] = '1' and ([directory_2] = '1' or [directory_2] = '3') | y |

|                |                                                                                                      |                                                                                                                                                                                                                                                                                                                                                                                                                                                                                       |                                                                      |   |
|----------------|------------------------------------------------------------------------------------------------------|---------------------------------------------------------------------------------------------------------------------------------------------------------------------------------------------------------------------------------------------------------------------------------------------------------------------------------------------------------------------------------------------------------------------------------------------------------------------------------------|----------------------------------------------------------------------|---|
| demographics_g | Please select the categories that describe you: Please select all that apply.                        | 1, American Indian or Alaska Native   2, Asian   3, Black/African American   4, Hispanic/Latino   5, Native Hawaiian Pacific Islander   6, White   7, Mixed   8, Some other race, ethnicity or origin ____   9, Prefer to not answer                                                                                                                                                                                                                                                  | [directory_1] = '1' and ([directory_2] = '1' or [directory_2] = '3') | y |
| demographics_h | What is your current employment status?                                                              | 1, Employed full time   2, Employed part time   3, Self-employed   4, Unemployed   5, Retired   6, Disability or unable to work                                                                                                                                                                                                                                                                                                                                                       | [directory_1] = '1' and ([directory_2] = '1' or [directory_2] = '3') | y |
| demographics_i | What is your highest level of education?                                                             | 1, Less than a high school diploma   2, High school degree or equivalent (e.g. GED)   3, Some college, no degree   4, Trade/technical school (vocational training)   5, Associate degree (e.g. AA, AS)   6, Bachelor's degree (e.g. BA, BS)   7, Master's degree (e.g. MA, MS, MEd)   8, Professional degree (e.g. MD, DDS, DVM)   9, Doctorate (e.g. PhD, EdD)                                                                                                                       | [directory_1] = '1' and ([directory_2] = '1' or [directory_2] = '3') | y |
| demographics_j | What is your current yearly household income? include income from Social Security, investment, etc.) | 1, Less than \$25,000   2, \$25,000 to \$34,999   3, \$35,000 to \$49,999   4, \$50,000 to \$74,999   5, \$75,000 to \$99,999   6, \$100,000 to \$149,999   7, \$150,000 to \$199,999   8, \$200,000 or more   9, Prefer not to say                                                                                                                                                                                                                                                   | [directory_1] = '1' and ([directory_2] = '1' or [directory_2] = '3') | y |
| demographics_k | In what country do you currently live?                                                               | 1, United States   2, Afghanistan   3, Albania   4, Algeria   5, Andorra   6, Angola   7, Antigua and Barbuda   8, Argentina   9, Armenia   10, Australia   11, Austria   12, Azerbaijan   13, The Bahamas   14, Bahrain   15, Bangladesh   16, Barbados   17, Belarus   18, Belgium   19, Belize   20, Benin   21, Bhutan   22, Bolivia   23, Bosnia and Herzegovina   24, Botswana   25, Brazil   26, Brunei   27, Bulgaria   28, Burkina Faso   29, Burundi   30, Cabo Verde   31, | [directory_1] = '1' and ([directory_2] = '1' or [directory_2] = '3') | y |

|  |  |                                                                                                                                                                                                                                                                                                                                                                                                                                                                                                                                                                                                                                                                                                                                                                                                                                                                                                                                                                                                                                                                                                                                                                                                                                                                                                                                                                                                                                                                                                                           |  |
|--|--|---------------------------------------------------------------------------------------------------------------------------------------------------------------------------------------------------------------------------------------------------------------------------------------------------------------------------------------------------------------------------------------------------------------------------------------------------------------------------------------------------------------------------------------------------------------------------------------------------------------------------------------------------------------------------------------------------------------------------------------------------------------------------------------------------------------------------------------------------------------------------------------------------------------------------------------------------------------------------------------------------------------------------------------------------------------------------------------------------------------------------------------------------------------------------------------------------------------------------------------------------------------------------------------------------------------------------------------------------------------------------------------------------------------------------------------------------------------------------------------------------------------------------|--|
|  |  | <p>Cambodia   32, Cameroon   33, Canada   34, Central African Republic   35, Chad   36, Chile   37, China   38, Colombia   39, Comoros   40, Congo Democratic Republic of the   41, Congo Republic of the   42, Costa Rica   43, Côte d'Ivoire   44, Croatia   45, Cuba   46, Cyprus   47, Czech Republic   48, Denmark   49, Djibouti   50, Dominica   51, Dominican Republic   52, East Timor (Timor-Leste)   53, Ecuador   54, Egypt   55, El Salvador   56, Equatorial Guinea   57, Eritrea   58, Estonia   59, Eswatini   60, Ethiopia   61, Fiji   62, Finland   63, France   64, Gabon   65, The Gambia   66, Georgia   67, Germany   68, Ghana   69, Greece   70, Grenada   71, Guatemala   72, Guinea   73, Guinea-Bissau   74, Guyana   75, Haiti   76, Honduras   77, Hungary   78, Iceland   79, India   80, Indonesia   81, Iran   82, Iraq   83, Ireland   84, Israel   85, Italy   86, Jamaica   87, Japan   88, Jordan   89, Kazakhstan   90, Kenya   91, Kiribati   92, Korea North   93, Korea South   94, Kosovo   95, Kuwait   96, Kyrgyzstan   97, Laos   98, Latvia   99, Lebanon   100, Lesotho   101, Liberia   102, Libya   103, Liechtenstein   104, Lithuania   105, Luxembourg   106, Madagascar   107, Malawi   108, Malaysia   109, Maldives   110, Mali   111, Malta   112, Marshall Islands   113, Mauritania   114, Mauritius   115, Mexico   Micronesia, Federated States of   116, Moldova   117, Monaco   118, Mongolia   119, Montenegro   120, Morocco   121, Mozambique   122,</p> |  |
|--|--|---------------------------------------------------------------------------------------------------------------------------------------------------------------------------------------------------------------------------------------------------------------------------------------------------------------------------------------------------------------------------------------------------------------------------------------------------------------------------------------------------------------------------------------------------------------------------------------------------------------------------------------------------------------------------------------------------------------------------------------------------------------------------------------------------------------------------------------------------------------------------------------------------------------------------------------------------------------------------------------------------------------------------------------------------------------------------------------------------------------------------------------------------------------------------------------------------------------------------------------------------------------------------------------------------------------------------------------------------------------------------------------------------------------------------------------------------------------------------------------------------------------------------|--|



|                |                                      |                                                                                                                                                                                                                                                                                                                                                                                                                                                                                                                                                                                                                                                                                                                                                                                                                                                                                                                                                                                                                                                                                                                                                                                                                                                                                                                |                                                                                                        |   |
|----------------|--------------------------------------|----------------------------------------------------------------------------------------------------------------------------------------------------------------------------------------------------------------------------------------------------------------------------------------------------------------------------------------------------------------------------------------------------------------------------------------------------------------------------------------------------------------------------------------------------------------------------------------------------------------------------------------------------------------------------------------------------------------------------------------------------------------------------------------------------------------------------------------------------------------------------------------------------------------------------------------------------------------------------------------------------------------------------------------------------------------------------------------------------------------------------------------------------------------------------------------------------------------------------------------------------------------------------------------------------------------|--------------------------------------------------------------------------------------------------------|---|
|                |                                      | <p>Myanmar (Burma)   123, Namibia   124, Nauru   125, Nepal   126, Netherlands   127, New Zealand   128, Nicaragua   129, Niger   130, Nigeria   131, North Macedonia   132, Norway   133, Oman   134, Pakistan   135, Palau   136, Panama   137, Papua New Guinea   138, Paraguay   139, Peru   140, Philippines   141, Poland   142, Portugal   143, Qatar   144, Romania   145, Russia   146, Rwanda   147, Saint Kitts and Nevis   148, Saint Lucia   149, Saint Vincent and the Grenadines   150, Samoa   151, San Marino   152, Sao Tome and Principe   153, Saudi Arabia   154, Senegal   155, Serbia   156, Seychelles   157, Sierra Leone   158, Singapore   159, Slovakia   160, Slovenia   161, Solomon Islands   162, Somalia   163, South Africa   164, Spain   165, Sri Lanka   166, Sudan   167, Sudan South   168, Suriname   169, Sweden   170, Switzerland   171, Syria   172, Taiwan   173, Tajikistan   174, Tanzania   175, Thailand   176, Togo   177, Tonga   178, Trinidad and Tobago   179, Tunisia   180, Turkey   181, Turkmenistan   182, Tuvalu   183, Uganda   184, Ukraine   185, United Arab Emirates   186, United Kingdom   187, Uruguay   188, Uzbekistan   189, Vanuatu   190, Vatican City   191, Venezuela   192, Vietnam   193, Yemen   194, Zambia   195, Zimbabwe</p> |                                                                                                        |   |
| demographics_m | In what state do you currently live? | <p>1, Alabama   2, Alaska   3, Arizona   4, Arkansas   5, California   6, Colorado   7, Connecticut   8, Delaware   9, Florida   10, Georgia   11, Hawaii   12, Idaho   13, Illinois   14, Indiana   15, Iowa   16, Kansas   17, Kentucky   18,</p>                                                                                                                                                                                                                                                                                                                                                                                                                                                                                                                                                                                                                                                                                                                                                                                                                                                                                                                                                                                                                                                            | <p>[directory_1] = '1' and ([directory_2] = '1' or [directory_2] = '3') and [demographics_k] = '1'</p> | y |

|                |                                                                                                       |                                                                                                                                                                                                                                                                                                                                                                                                                                                                                                                                             |                                                                      |   |
|----------------|-------------------------------------------------------------------------------------------------------|---------------------------------------------------------------------------------------------------------------------------------------------------------------------------------------------------------------------------------------------------------------------------------------------------------------------------------------------------------------------------------------------------------------------------------------------------------------------------------------------------------------------------------------------|----------------------------------------------------------------------|---|
|                |                                                                                                       | Louisiana   19, Maine   20, Maryland   21, Massachusetts   22, Michigan   23, Minnesota   24, Mississippi   25, Missouri   26, Montana   27, Nebraska   28, Nevada   29, New Hampshire   30, New Jersey   31, New Mexico   32, New York   33, North Carolina   34, North Dakota   35, Ohio   36, Oklahoma   37, Oregon   38, Pennsylvania   39, Rhode Island   40, South Carolina   41, South Dakota   42, Tennessee   43, Texas   44, Utah   45, Vermont   46, Virginia   47, Washington   48, West Virginia   49, Wisconsin   50, Wyoming |                                                                      |   |
| demographics_l | In what city do you currently live?                                                                   |                                                                                                                                                                                                                                                                                                                                                                                                                                                                                                                                             | [directory_1] = '1' and ([directory_2] = '1' or [directory_2] = '3') | y |
| demographics_n | Because location can be a risk factor for the coronavirus, please also provide your current zip code. |                                                                                                                                                                                                                                                                                                                                                                                                                                                                                                                                             | [directory_1] = '1' and ([directory_2] = '1' or [directory_2] = '3') |   |
| demographics_o | Did anyone help you complete this survey today?                                                       | 1, Yes, my care partner   2, Yes, a family member   3, Yes, a friend   4, No, I completed the survey on my own                                                                                                                                                                                                                                                                                                                                                                                                                              | [directory_1] = '1' and ([directory_2] = '1' or [directory_2] = '3') | y |
